# Supplementary material for: Prognostic factors and outcomes of invasive pulmonary aspergillosis, a retrospective hospital-based study
Source: PeerJ. 2024 Feb 28;12:e17066. doi: 10.7717/peerj.17066 (PMC10908254; doi:10.7717/peerj.17066)
Supplement: Supplemental Information 1 [file peerj-12-17066-s001.xlsx]

## Sheet: Data
group	group2	Sex	Age	Cr	HGB	hsCRP	Plate	WBC	Total Bilirubin	Albumin	GM_test	Blood_Death_Mini	Blood_Death_Max	Blood_Dialysis_Mini	Blood_Dialysis_Max	Blood_OnVentilator_Mini	Blood_OnVentilator_Max	Glucocorticoid	Death	cause	cause	ICD	HEMODIALYSIS	DIALYSIS	dialysis_dis	COPD	Asthma	Liver_Cirrhosis	DM	Acute_myeloid	Acute_lymphoid	Chronic_myeloi	Chronic_lympho	NonHodgkin_lym	Multiple_myelo	Aplastic_anemi	Other_haematol	Haemotological	hematological_dis	Lung_cancer	Head_neck	Gastrointestin	Breast_cancer	Melanoma	Cancer	Liver_transplant	Kidney_transplant	Liver_Kidney_transplant	OnVentilator
9	3	F	74															0	1	01	1	ICD9	0	0	0	0	0	0	0	0	0	0	0	0	0	0	0	0	0	0	0	0	0	0	0	0	0	0	0
1	1	M	58		6.9	7.05	854	19900	1.2									1	1	01	1	ICD10	0	0	0	0	0	0	0	0	1	0	0	0	0	0	0	0	1	0	0	0	0	0	0	0	0	0	0
2	1	M	70	2.6	9.4	1.25	61	6200	0.2	4.3								1	1	01	1	ICD10	0	0	0	0	0	0	0	0	0	0	0	0	1	0	0	0	1	0	0	0	0	0	0	0	0	0	0
1	1	M	72	1	9.4	15.47	73	2900	0.5									0	1	01	1	ICD10	0	0	0	0	0	0	0	1	0	0	0	0	0	0	0	0	1	0	0	0	0	0	0	0	0	0	0
9	3	M	83		11.5	17.48	321	19100	0.5									1	1	36	36	ICD10	0	0	0	0	0	0	0	0	0	0	0	0	0	0	0	0	0	0	0	0	0	0	0	0	0	0	0
1	1	F	41	0.7	9.5	7.32	302	2000	1.4									0	1	01	1	ICD10	0	0	0	0	0	0	0	1	0	0	0	0	0	0	0	0	1	0	0	0	0	0	0	0	0	0	0
6	0	F	84		10.8	52.03	182	4500	0.3									0	1	36	36	ICD10	0	0	0	0	0	0	0	0	0	0	0	0	0	0	0	0	0	0	0	0	0	0	0	0	0	0	0
1	1	M	63	1.1	13.5	0.23	240	8600	0.4	4.3								1	1	01	1	ICD10	0	0	0	0	0	0	0	1	0	0	0	0	0	0	0	0	1	0	0	0	0	0	0	0	0	0	0
1	1	F	41		9.5	3.15	22	900	0.6									0	1	03	3	ICD10	0	0	0	0	0	0	0	0	0	0	0	0	0	1	0	0	1	0	0	0	0	0	0	0	0	0	0
9	3	F	72	1.2	7.5	3.85	20	600	1.2									0	1	01	1	ICD10	0	0	0	0	0	0	0	0	0	0	0	0	0	0	0	0	0	0	0	0	0	0	0	0	0	0	0
0	0	M	78	0.8	10.9	16.09	321	22400	0.5	4.3								1	1	36	36	ICD10	0	0	0	1	1	0	0	0	0	0	0	0	0	0	0	0	0	0	0	0	0	0	0	0	0	0	0
9	3	M	88	1	15	0.12	144	8900	0.6									1	1	12	12	ICD10	0	0	0	1	0	0	0	0	0	0	0	0	0	0	0	0	0	0	0	0	0	0	0	0	0	0	0
1	1	M	27	0.5	7.7	0.79	73	102800	0.5		1.369	0.111	1.575	0.111	1.575	0.111	1.575	1	1	01	1	ICD10	0	0	0	0	0	0	0	1	0	0	0	0	0	0	0	0	1	0	0	0	0	0	0	0	0	0	0
2	1	M	20	0.1	7.5	5.81	20	7200	1.5		2.73	0.114	2.73	0.114	2.73	0.114	2.73	1	1	01	1	ICD10	0	0	0	0	1	0	0	1	0	0	0	0	0	0	0	0	1	0	0	0	0	0	0	0	0	0	0
0	0	F	24	0.4	7.3	26.44	8	1100	2.7		0.528	0.528	0.577	0.528	0.577	0.528	0.577	1	1	01	1	ICD10	0	0	0	0	0	0	0	0	1	0	0	0	0	0	0	0	1	0	0	0	0	0	0	0	0	0	0
2	1	M	67	0.7	11.6	12.16	67	8300	1		1.294	0.138	1.551	0.138	1.551	0.138	1.551	1	1	01	1	ICD10	0	0	0	1	0	0	0	1	0	0	0	0	0	0	0	0	1	0	0	0	0	0	0	0	0	0	0
2	1	M	17	0.6	10.7	5.52	276	6200	0.3	2.8	1.271	0.069	1.414	0.069	1.414	0.069	1.414	1	1	01	1	ICD10	0	0	0	0	0	0	0	0	1	0	0	0	0	0	0	0	1	0	0	0	0	0	0	0	0	0	0
0	0	F	38	0.5	12.7	1.55	254	5800	0.4	3.5	0.17	0.17	0.285	0.17	0.285	0.17	0.285	0	1	01	1	ICD10	0	0	0	0	1	0	0	1	0	0	0	0	0	0	0	0	1	0	1	0	0	0	1	0	0	0	0
0	0	M	86															0	1	36	36	ICD10	0	0	0	0	0	0	0	0	0	0	0	0	0	0	0	0	0	0	0	0	0	0	0	0	0	0	0
2	1	F	68	3.11	7.6	14.95	11	300	0.6	3.9	0.13	0.108	0.51	0.108	0.51	0.108	0.51	1	1	01	1	ICD10	0	0	0	0	0	0	0	0	0	0	0	0	1	0	0	0	1	0	0	0	1	0	1	0	0	0	0
2	1	M	22		9.5	11.12	6	4500	0.7		0.831							0	1	01	1	ICD10	0	0	0	0	0	0	0	0	1	0	0	0	0	0	0	0	1	0	0	0	0	0	0	0	0	0	0
0	0	M	67	2.3	5.4	16.15	24	3200	1	4.6	0.703							0	1	01	1	ICD10	0	0	0	0	0	0	1	0	0	0	0	0	0	0	1	0	1	0	0	0	0	0	0	0	0	0	0
9	3	F	63	0.5	9.5	2.84	290	6900	0.4	4.3	0.087	0.087	0.103	0.087	0.103	0.087	0.103	0	1	01	1	ICD10	0	0	0	0	0	0	1	1	0	0	0	0	0	0	0	0	1	0	0	0	0	0	0	0	0	0	0
0	0	F	58	0.58	4.7	3.83	29	5340	0.8	3.2	0.135	0.097	0.135	0.097	0.135	0.097	0.135	1	1	02	2	ICD10	0	0	0	0	0	0	0	1	0	0	0	0	1	0	1	0	1	0	0	0	1	0	1	0	0	0	0
0	0	F	56	0.46	13.5	1.39	274	54160	1	2.1	0.608	0.509	0.608	0.509	0.608	0.509	0.608	1	1	01	1	ICD10	0	0	0	0	0	0	1	0	0	0	0	0	0	0	1	0	1	0	0	0	0	0	0	0	0	0	0
5	1	F	66	0.7	13.7	4.49	90	3860	0.4	2.5	0.278	0.091	1.64	0.091	1.64	0.091	1.64	0	1	15	15	ICD10	0	0	0	0	0	0	0	0	0	0	0	1	0	0	0	0	1	0	1	0	0	0	1	0	0	0	0
0	0	F	88	0.74	10.5	9.91	633	9700	1.4									0	1	22	22	ICD10	0	0	0	0	1	0	0	0	0	0	0	0	0	0	0	0	0	0	0	0	0	0	0	0	0	0	0
1	1	M	31	0.63	10.2	15.42	112	2550	0.4	2.8	0.046							0	1	01	1	ICD10	0	0	0	0	0	0	0	1	0	0	0	0	0	0	0	0	1	0	0	0	0	0	0	0	0	0	0
1	1	F	56	0.68	8.3	9.07	151	3460	0.7	2.8	0.476							1	1	01	1	ICD10	0	0	0	0	0	0	1	0	1	0	0	0	0	0	0	0	1	0	0	0	0	0	0	0	0	0	0
1	1	M	82	0.81	10.8	2.41	32	1470	0.9		0.111							0	1	01	1	ICD10	0	0	0	0	0	0	1	1	0	0	0	0	0	0	1	0	1	0	0	0	0	0	0	0	0	0	0
0	0	M	57		12.8		223	7500			0.238							0	1	01	1	ICD10	0	0	0	0	0	0	0	0	0	0	0	0	0	0	0	0	0	0	0	1	0	0	1	0	0	0	0
0	0	M	93	0.63	8.5	22.15	85	4700	1	3.7	0.165							0	1	01	1	ICD10	0	0	0	0	0	0	0	0	0	0	0	0	0	0	0	0	0	0	0	0	0	0	0	0	0	0	0
1	1	F	70	0.63	12.3	8.519	108	3600	0.4	4	0.056							1	1	01	1	ICD10	0	0	0	0	0	0	0	0	1	0	0	1	0	1	0	0	1	1	0	0	0	0	1	0	0	0	0
7	2	M	68	0.7	14.5	5.16	298	9900	1	2.8	0.098	0.047	0.098	0.047	0.098	0.047	0.098	0	1	11	11	ICD10	0	0	0	1	0	0	0	0	0	0	0	0	0	0	0	0	0	1	0	0	0	0	1	0	0	0	0
1	1	F	68	1.1	8.1	30.79	60	3060	0.4	3.4	0.05	0.05	0.074	0.05	0.074	0.05	0.074	1	1	01	1	ICD10	0	0	0	0	0	0	0	0	1	0	0	0	0	0	0	0	1	0	0	0	0	0	0	0	0	0	0
4	1	M	76	1.21	9.8	26.08	81	15420	0.6	2.7	0.139							0	1	01	1	ICD10	0	0	0	0	0	0	0	0	0	0	0	0	0	0	0	0	0	0	0	0	0	0	0	0	0	0	0
6	0	M	94	2.43	9.2	8.697	75	5440	1.2		0.077							0	1	14	14	ICD10	0	0	0	1	0	0	0	0	0	0	0	0	0	0	0	0	0	0	0	0	0	0	0	0	0	0	0
4	1	M	79	1.54	12.2	34.01	323	8870	0.8	4.2	0.089							0	1	01	1	ICD10	0	0	0	1	0	0	0	0	0	0	0	0	0	0	0	0	0	0	0	0	0	0	0	0	0	0	0
4	1	M	74	1.05	10.2	20.2	450	18700	0.5		0.063	0.04	6.928	0.04	6.928	0.04	6.928	0	1	01	1	ICD10	0	0	0	1	0	0	0	0	0	0	0	0	0	0	0	0	0	1	0	0	0	0	1	0	0	0	0
1	1	M	62	0.58	5.8	14.69	128	28640	0.4	3.6	0.149							0	1	01	1	ICD10	0	0	0	0	0	0	0	1	0	0	0	0	0	0	0	0	1	0	0	0	0	0	0	0	0	0	0
3	1	M	89	0.94	13.2	19.63	401	24530	0.4	2.4	0.076	0.076	0.117	0.076	0.117	0.076	0.117	0	1	01	1	ICD10	0	0	0	1	0	0	0	0	0	0	0	0	0	0	0	0	0	1	0	0	0	0	1	0	0	0	0
3	1	M	54		15.5	28.3	113	13070	1.8		0.474	0.085	0.474	0.085	0.474	0.085	0.474	0	1	36	36	ICD10	0	0	0	0	0	0	0	0	0	0	0	0	0	0	0	0	0	0	0	0	0	0	0	0	0	0	0
1	1	M	63	0.68	12.6	8.4	157	3660	0.3	3.2	0.123	0.064	0.616	0.064	0.616	0.064	0.616	0	1	36	36	ICD10	0	0	0	1	0	0	0	1	0	0	0	0	0	0	0	0	1	0	0	0	0	0	0	0	0	0	0
2	1	F	59	0.65	10.4	0.99	113	11110	0.8		0.49							1	1	26	26	ICD10	0	0	0	0	0	0	0	0	0	0	0	0	0	0	0	0	0	0	0	0	0	0	0	0	0	0	0
2	1	F	60	0.77	9.2	5.759	285	8830	1		0.082	0.022	6.203	0.022	6.203	0.022	6.203	0	1	01	1	ICD10	0	0	0	0	0	0	0	0	0	0	0	0	0	0	0	0	0	0	0	0	0	0	0	0	0	0	0
2	1	M	51	0.61	12.4	14.65	46	28710	0.6		0.143							0	1	01	1	ICD10	0	0	0	0	0	0	0	0	0	0	0	0	0	0	0	0	0	0	0	0	0	0	0	0	0	0	0
6	0	M	50	1.3	9.8	0.6	443	6100	0.2		0.4							1	1	01	1	ICD10	0	0	0	1	0	0	0	0	0	0	0	0	0	0	0	0	0	0	0	0	0	0	0	0	0	0	0
0	0	F	52	0.5	15.3		507	14600		3								0	1	18	18	ICD10	0	0	0	1	1	0	0	0	0	0	0	0	0	0	0	0	0	0	0	0	0	0	0	0	0	0	0
0	0	M	50	0.62	11.5	10.69	126	10550	0.7	4.7	0.059	0.025	2.315	0.025	2.315	0.025	2.315	1	1	01	1	ICD10	0	0	0	0	0	0	0	1	0	0	0	0	0	0	1	0	1	0	0	0	0	0	0	0	0	0	0
0	0	M	66	0.61	13.6	8.09	440	12240	0.9	4.5	0.893							0	1	18	18	ICD10	0	0	0	0	0	0	0	0	0	0	0	0	0	0	0	0	0	0	1	0	0	0	1	0	0	0	0
1	1	F	65	1.13	10.5	1.079	109	10050	0.2	4.8	0.066	0.103	0.124	0.103	0.124	0.103	0.124	1	1	01	1	ICD10	0	0	0	0	1	0	1	0	0	0	0	1	0	0	1	0	1	0	0	1	0	0	1	0	0	0	0
1	1	F	60	0.81	15	0.491	271	8690	0.3	3.8	1.009							1	1	01	1	ICD10	0	0	0	0	0	0	0	0	0	0	0	0	0	0	0	0	0	1	0	0	0	0	1	0	0	0	0
0	0	M	67	1.03	14.2		313	9130	0.7	3.1	0.052							1	1	34	34	ICD10	0	0	0	0	1	0	0	0	0	0	0	0	0	0	0	0	0	0	0	0	0	0	0	0	0	0	0
0	0	F	69	0.49	12.1			9560										0	1	36	36	ICD10	0	0	0	1	0	0	0	0	0	0	0	0	0	0	0	0	0	0	0	0	0	0	0	0	0	0	0
0	0	M	78	0.71	11.6	6.827	350	13270	0.3	2.6								0	1	01	1	ICD10	0	0	0	0	0	0	0	0	0	0	0	0	0	0	0	0	0	1	0	0	0	0	1	0	0	0	0
1	1	M	70	0.67	7.9		54	66400	0.3		0.038	0.038	0.076	0.038	0.076	0.038	0.076	0	1	01	1	ICD10	0	0	0	0	0	0	1	0	0	0	0	0	0	0	0	0	0	0	0	0	0	0	0	0	0	0	0
1	1	M	74	0.7	9.6	3.92	284	8200	0.2		0.285							0	1	01	1	ICD10	0	0	0	0	0	0	0	1	0	0	0	0	0	0	0	0	1	0	0	0	0	0	0	0	0	0	0
9	3	M	89	1	10.8	9.36	313	9650	0.3	3								1	1	01	1	ICD10	0	0	0	0	0	0	0	0	0	0	0	0	0	0	0	0	0	0	0	1	0	0	1	0	0	0	0
1	1	M	58	1.05	8.8	27.878	12	170	4.52		0.058	0.038	0.058	0.038	0.058	0.038	0.058	1	1	02	2	ICD10	0	0	0	0	0	0	0	0	0	0	0	0	0	1	1	0	1	0	0	0	0	0	0	0	0	0	0
2	1	F	72	0.72	8.1	28.82	26	39320	2.77	2.7	0.071	0.042	5.638	0.042	5.638	0.042	5.638	0	1	01	1	ICD10	0	0	0	0	0	0	1	1	0	0	0	0	0	1	1	0	1	0	0	1	0	0	1	0	0	0	0
9	3	F	72	0.56	13.1		188	10900	0.28		6.5							0	1	36	36	ICD10	0	0	0	0	0	0	1	0	0	0	0	0	0	0	0	0	0	0	0	0	0	0	0	0	0	0	0
1	1	F	66	0.53	5.9		0	130	0.6	2.8	0.073							0	1	03	3	ICD10	0	0	0	0	0	0	0	0	0	0	0	0	0	0	0	0	0	0	0	0	0	0	0	0	0	0	0
0	0	M	77	1.18	14.3			10980			0.034							0	1	18	18	ICD10	0	0	0	1	1	0	0	0	0	0	0	0	0	0	0	0	0	0	0	0	0	0	0	0	0	0	0
0	0	M	86	1.81	13.5		199	11250			0.511							0	1	16	16	ICD10	0	0	0	0	1	0	0	0	0	0	0	0	0	0	0	0	0	1	0	0	0	0	1	0	0	0	0
7	2	F	52	0.46	12.5	3.19	176	11760	0.5		0.081							1	1	01	1	ICD10	0	0	0	0	1	0	0	1	0	1	0	0	0	0	1	1	1	0	0	0	0	0	0	0	0	0	0
0	0	M	81	0.94	8.8	0.11	46	1770	0.51	3	0.052	0.048	0.078	0.048	0.078	0.048	0.078	0	1	36	36	ICD10	0	0	0	0	0	0	0	1	0	0	0	0	0	0	1	0	1	0	0	0	0	0	0	0	0	0	0
1	1	M	30	0.78	10.5		140	2560	0.4	3.3	0.042							0	1	36	36	ICD10	0	0	0	0	0	0	0	0	0	0	0	1	0	0	0	0	1	0	0	0	0	0	0	0	0	0	0
1	1	F	66	0.9	10.2	18.28	150	11700	0.9	3.4								1	0				0	0	0	0	0	0	0	1	0	0	0	0	0	0	0	0	1	0	0	0	0	0	0	0	0	0	0
8	3	M	44	0.8	15.8		264	11600										0	0				0	0	0	0	0	0	0	0	0	0	0	0	0	0	0	0	0	0	0	0	0	0	0	0	0	0	0
9	3	F	60	0.6	12	0.28	291	6600			1.195	0.512	1.195	0.512	1.195	0.512	1.195	0	0				0	0	0	0	0	0	0	0	0	0	0	0	0	0	0	0	0	0	0	0	0	0	0	0	0	0	0
1	1	M	52	1.1	12.5	10.92	179	3900	0.6		0.324							0	0				0	0	0	0	0	0	0	1	0	0	0	0	0	0	0	0	1	0	0	0	0	0	0	0	0	0	0
3	1	M	54		14		271	18000	1.3		0.368	0.143	0.465	0.143	0.465	0.143	0.465	0	0				0	0	0	0	0	0	0	0	0	0	0	0	0	0	0	0	0	0	0	0	0	0	0	0	0	0	0
0	0	M	35															0	0				0	0	0	0	1	0	0	0	0	0	0	0	0	0	0	0	0	0	0	0	0	0	0	0	0	0	0
0	0	F	77	1	9.6		404	14200		3.9								1	0				0	0	0	0	0	0	0	0	0	0	0	0	0	0	0	0	0	0	0	0	0	0	0	0	0	0	0
0	0	F	67															0	0				0	0	0	0	0	0	0	0	0	0	0	0	0	0	0	0	0	0	0	0	0	0	0	0	0	0	0
1	1	M	26	0.6	10.2	11.59	451	7400	0.3		0.105	0.105	0.188	0.105	0.188	0.105	0.188	0	0				0	0	0	0	0	0	0	0	1	0	0	0	0	0	0	0	1	0	0	0	0	0	0	0	0	0	0
0	0	M	53	0.98	16.1	0.66	208	18600	0.8	4.3	0.095							1	0				0	0	0	1	1	0	0	0	0	0	0	0	0	0	0	0	0	0	0	0	0	1	1	0	0	0	0
2	1	M	80	0.93	13.4	3.12	239	5400	0.8		0.894	0.037	1.04	0.037	1.04	0.037	1.04	0	0				0	0	0	0	0	0	1	0	0	0	0	0	0	0	0	0	0	0	0	0	0	0	0	0	0	0	0
0	0	M	67	0.62	12.2	4.57	277	8200	0.8		0.083	0.049	0.083	0.049	0.083	0.049	0.083	1	0				0	0	0	0	1	0	0	0	0	0	0	0	0	0	0	0	0	1	0	0	0	0	1	0	0	0	0
4	1	F	76	0.66	12.5	0.63	272	25000	0.5		4.467							1	0				0	0	0	0	1	0	0	0	0	0	0	0	0	0	0	0	0	0	0	0	0	0	0	0	0	0	0
3	1	M	77	1	14.4		131	15400	0.7	3.9	0.217	0.217	0.382	0.217	0.382	0.217	0.382	0	0				0	0	0	0	0	0	0	0	0	0	0	0	0	0	0	0	0	0	0	0	0	0	0	0	0	0	0
3	1	F	67	0.76	13.8		186	3840	0.2	3.9	0.057	0.057	0.168	0.057	0.168	0.057	0.168	0	0				0	0	0	0	0	0	0	0	0	0	0	0	0	0	0	0	1	0	0	0	0	0	0	0	0	0	0
0	0	F	79	0.84	11.4	1.157	315	14770		4.7	0.092							1	0				0	0	0	0	0	0	0	0	0	0	0	0	0	0	1	0	1	1	0	1	0	0	1	0	0	0	0
9	3	F	74	0.78	10.4		324	7750	0.3		2.353							0	0				0	0	0	0	0	0	0	0	0	0	0	0	0	0	0	0	1	0	0	0	0	0	0	0	0	0	0
0	0	F	56	0.66	10.9	0.316	478	7640	0.6		0.146	0.033	0.146	0.033	0.146	0.033	0.146	0	0				0	0	0	0	1	0	0	0	0	0	0	0	0	0	0	0	0	0	0	0	0	0	0	0	0	0	0
0	0	F	76	0.72	11.7	2.178	260	12650			0.217	0.128	0.217	0.128	0.217	0.128	0.217	1	0				0	0	0	0	0	0	0	0	0	0	0	0	0	0	0	0	0	0	0	0	0	0	0	0	0	0	0
1	1	F	69	1.04	9.7	0.974	80	5060	0.4	4.3	0.029							0	0				0	0	0	0	0	0	0	1	0	0	0	0	0	0	0	0	1	0	0	0	0	0	0	0	0	0	0
0	0	M	68	0.73	15.5		263	4700		4.5	0.084							1	0				0	0	0	1	1	0	1	0	0	0	0	0	0	0	0	0	0	0	0	0	0	0	0	0	0	0	0
9	3	F	28		13.2	0.189	317	6530										0	0				0	0	0	0	0	0	0	0	0	0	0	0	0	0	0	0	0	0	0	0	0	0	0	0	0	0	0
0	0	M	88															0	0				0	0	0	0	0	0	0	0	0	0	0	0	0	0	0	0	0	0	0	0	0	0	0	0	0	0	0
0	0	F	59	0.61	11.4	5.889	505	15620	0.2	3.6								0	0				0	0	0	0	1	0	0	0	0	0	0	0	0	0	0	0	0	1	0	0	1	0	1	0	0	0	0
1	1	M	37	0.74	10.5	5.2	118	13430	1.7		0.104	0.046	0.435	0.046	0.435	0.046	0.435	1	0				0	0	0	0	0	0	0	1	0	0	0	0	0	0	0	1	1	0	0	0	0	0	0	0	0	0	0
0	0	M	61	0.95	13.7	4.888	281	6640	0.4	4.1	0.051	0.051	0.052	0.051	0.052	0.051	0.052	0	0				0	0	0	0	1	0	0	0	0	0	0	1	0	0	0	0	1	1	0	0	0	0	1	0	0	0	0
0	0	M	78	0.51	11.7	2.341	428	5190	1.3		0.09							0	0				0	0	0	0	1	0	0	0	0	0	0	0	0	0	0	0	0	1	0	0	0	0	1	0	0	0	0
3	1	F	59	0.54	11.4		481	5860		3.7	0.127							0	0				0	0	0	0	0	0	0	0	0	0	0	0	0	0	0	0	0	0	0	0	0	0	0	0	0	0	0
2	1	F	44	0.71	9.2	0.364	103	11950	0.6		0.645							1	0				0	0	0	0	0	0	0	0	0	0	0	0	0	0	0	0	0	0	0	0	0	0	0	0	0	0	0
0	0	F	51	0.64														0	0				0	0	0	0	0	0	0	0	0	0	0	0	0	0	0	0	0	0	0	0	0	0	0	0	0	0	0
9	3	F	41	0.71	13.5	0.05	308	5950	0.52		0.201	0.065	0.201	0.065	0.201	0.065	0.201	0	0				0	0	0	0	0	0	0	0	0	0	0	0	0	0	0	0	0	0	0	0	0	0	0	0	0	0	0
0	0	M	79	4.03	10.6		224	8950			0.185							0	0				0	0	0	1	0	0	1	0	0	0	0	0	0	0	0	0	0	0	0	0	0	0	0	0	0	0	0
0	0	M	72	0.9	14.7		321	9340	0.99	4								0	0				0	0	0	0	0	0	0	0	0	0	0	0	0	0	0	0	0	0	0	0	0	0	0	0	0	0	0
0	0	F	46	0.57	11.7		441	8220										0	0				0	0	0	0	0	0	0	0	0	0	0	0	0	0	0	0	0	0	0	0	0	0	0	0	0	0	0
7	2	F	51	0.6	9.7	0.29	411	8500	0.22									0	0				0	0	0	0	0	0	0	0	0	0	0	0	0	0	0	0	0	0	0	0	0	0	0	0	0	0	0
0	0	M	92	0.89	13.9	0.119	413	10480	0.6	4.7	0.124							1	0				0	0	0	0	1	0	0	0	0	0	0	0	0	0	0	0	0	0	0	0	0	0	0	0	0	0	0
0	0	F	42	0.62							0.063							0	0				0	0	0	0	0	0	0	0	0	0	0	0	0	0	0	0	0	0	0	0	0	0	0	0	0	0	0
2	1	F	60	0.74	12.3	0.45	365	10090	0.6	3.9	1.413	0.069	1.413	0.069	1.413	0.069	1.413	1	0				0	0	0	0	0	0	0	0	0	0	0	0	0	0	0	0	0	0	0	0	0	0	0	0	0	0	0
0	0	F	50	0.69	13.7		331	5020										0	0				0	0	0	0	1	0	0	0	0	0	0	0	0	0	0	0	0	0	0	0	0	0	0	0	0	0	0
0	0	M	51	1.03	15.9		201	7200										0	0				0	0	0	0	1	0	0	0	0	0	0	0	0	0	0	0	0	0	0	0	0	0	0	0	0	0	0
0	0	F	26	0.41	11.6	11.73	402	6650	0.6	4.4	0.083							1	0				0	0	0	0	0	0	0	1	1	0	0	0	0	0	0	0	1	0	0	0	0	0	0	0	0	0	0
2	1	F	68	0.55	10.6	0.072	237	8040	0.4	2.5	0.187	0.051	0.187	0.051	0.187	0.051	0.187	1	0				0	0	0	0	0	0	0	0	0	0	0	0	0	0	0	0	1	0	0	0	0	0	0	0	0	0	0
9	3	F	64	1.01	11.8		228	6070		4.5								0	0				0	0	0	0	0	0	0	0	0	0	0	0	0	0	0	0	0	0	0	0	0	0	0	0	0	0	0
9	3	F	64	0.75	14.1		334	8250	0.3		0.084							1	0				0	0	0	0	0	0	1	0	0	0	0	0	0	0	0	0	0	0	0	0	0	0	0	0	0	0	0
0	0	M	40		13.7		291	9160	0.9		0.032							1	0				0	0	0	0	1	0	0	0	0	0	0	0	0	0	0	0	0	0	0	0	0	0	0	0	0	0	0
2	1	F	54	0.87	12	0.719	162	6300	0.3	4.6	0.026	0.026	0.538	0.026	0.538	0.026	0.538	1	0				0	0	0	0	0	0	0	1	0	0	0	0	0	0	0	0	1	0	0	0	0	0	0	0	0	0	0
7	2	M	72	0.73	12.5		465	8310		3.4								0	0				0	0	0	1	1	0	0	0	0	0	0	0	0	0	0	0	0	0	0	0	0	0	0	0	0	0	0
0	0	M	77	9.09	9.6		397	7860	0.1									0	0				0	0	0	1	0	0	0	0	0	0	0	0	0	0	0	0	0	0	0	0	0	0	0	0	0	0	0
7	2	F	56	0.66	13.3		159	5450			0.114							0	0				0	0	0	1	0	0	0	0	0	0	0	0	0	0	0	0	1	0	0	0	0	0	0	0	0	0	0
1	1	F	14	0.53	8		7	260	0.9	4.3	0.177	0.047	0.177	0.047	0.177	0.047	0.177	0	0				0	0	0	0	0	0	0	0	0	0	0	0	0	0	0	0	0	0	0	0	0	0	0	0	0	0	0
1	1	M	50	1.03	9.2		109	3070	0.42	4	0.098	0.083	0.19	0.083	0.19	0.083	0.19	1	0				0	0	0	0	0	0	0	1	0	0	0	0	0	0	0	0	1	0	0	0	0	0	0	0	0	0	0
0	0	F	52	0.83	11.7		311	5800	0.33	3.6	0.073	0.073	0.286					0	0				0	0	0	1	0	0	0	0	0	0	0	0	0	0	0	0	0	0	0	0	0	0	0	0	0	0	0
1	1	F	28	0.56	10.6	18	469	7120	0.4	4.4	0.042							0	0				0	0	0	0	0	0	0	1	0	0	0	0	0	0	1	1	1	0	0	0	0	0	0	0	0	0	0
6	0	F	61	0.71	14.2	2.274	76	2550	2.42	3.9	0.121							0	0				0	0	0	0	0	1	0	0	0	0	0	0	0	1	0	0	1	0	0	1	0	0	1	0	0	0	0
7	2	M	28	1.11	14.3	8.8	184	10610	0.5		0.039	0.039	0.081	0.039	0.081	0.039	0.081	0	0				0	0	0	0	0	0	0	0	0	0	0	1	0	0	0	0	1	0	0	0	0	0	0	0	0	0	0
0	0	F	59	1.07	13.6		353	4080	0.29		0.089	0.038	0.172	0.038	0.172	0.038	0.172	1	0				0	0	0	0	0	0	0	0	0	0	0	0	0	0	0	0	0	0	0	0	0	0	0	0	0	0	0
9	3	M	70	0.99	13.3		242	4430	0.4		0.267							0	0				0	0	0	0	0	0	0	0	0	0	0	0	0	0	0	0	0	0	0	0	0	0	0	0	0	0	0
9	3	M	22	1.19	15.1		258	6150			0.128							1	0				0	0	0	0	1	0	0	0	0	0	0	0	0	0	0	0	0	0	0	0	0	0	0	0	0	0	0
4	1	M	59	1	11.7		432	10690	0.4		0.157	0.09	0.157	0.09	0.157	0.09	0.157	0	0				0	0	0	1	0	0	0	0	0	0	0	0	0	0	0	0	0	0	1	0	0	0	1	0	0	0	0
7	2	M	60	0.77	11.3		362	11000	0.26		0.174							1	0				0	0	0	0	0	0	0	0	0	0	0	0	0	0	0	0	0	0	0	0	0	0	0	0	0	0	0
9	3	M	34	0.66	10.5		57	6970	0.39	3.8	0.109							1	0				0	0	0	0	0	0	0	1	0	0	0	0	0	0	0	0	1	0	0	0	0	0	0	0	0	0	0
9	3	M	69	1.12	13.3		373	9030			0.118							0	0				0	0	0	0	0	0	1	0	0	0	0	0	0	0	0	0	0	0	0	0	0	0	0	0	0	0	0
0	0	M	32	1.26	12.3		305	6410	0.33	3.3	0.079	0.032	0.079	0.032	0.079	0.032	0.079	1	0				0	0	0	0	0	0	0	0	0	0	0	0	0	0	0	0	0	0	0	0	0	0	0	0	0	0	0
0	0	M	44	1.1	15.3	24.02	123	5900	1.1									0	0				0	0	0	0	0	0	0	0	0	0	0	0	0	0	0	0	0	0	1	0	0	0	1	0	0	0	0
0	0	M	45	0.79	15.6	0.13	308	4740	0.3	4.4								1	0				0	0	0	1	1	0	1	0	0	0	0	0	0	0	0	0	0	0	0	1	0	0	1	0	0	0	0
2	1	F	37	1.15	11		512	2210	0.49		0.164							1	0				0	0	0	0	1	0	0	0	0	0	0	1	0	0	1	0	1	0	0	0	0	0	0	0	0	0	0
3	1	F	51		14.4		372	10190	0.4									0	0				0	0	0	0	0	0	0	0	0	0	0	0	0	0	0	0	0	0	0	0	0	0	0	0	0	0	0
7	2	F	71	0.88	11.7		171	3710										0	0				0	0	0	1	0	0	0	0	0	0	0	0	0	0	0	0	0	0	0	1	0	0	1	0	0	0	0
1	1	M	60	1.13	11.5		118	4880	0.42	4.2	0.276	0.052	0.113	0.052	0.113	0.052	0.113	0	0				0	0	0	0	0	0	1	0	0	0	0	1	0	0	0	0	1	0	1	0	0	0	1	0	0	0	0
0	0	M	40	0.83	16.8		195	6400		4.8								0	0				0	0	0	0	1	0	1	0	0	0	0	0	0	0	0	0	0	0	0	0	0	0	0	0	0	0	0
1	1	F	54	0.66	11.2		227	5760	0.71	4.9	0.06	0.041	0.06					1	0				0	0	0	0	0	0	0	1	0	0	0	0	0	0	0	0	1	0	0	0	0	0	0	0	0	0	0
0	0	M	39	0.97	13.6	7.11	322	9490	0.31	4.7								1	0				0	0	0	0	0	0	0	0	0	0	0	0	0	0	0	0	0	1	0	0	0	0	1	0	0	0	0
9	3	F	65	0.69	13	0.317	292	6520	0.4		0.074							0	0				0	0	0	0	0	0	0	0	0	0	0	0	0	0	0	0	0	0	0	0	0	0	0	0	0	0	0
7	2	M	40	0.96	15		244	4660			0.068							0	0				0	0	0	0	0	0	0	0	0	0	0	0	0	0	0	0	0	0	0	0	0	0	0	0	0	0	0
0	0	M	45	0.7	14.3		299	8000		4.6	0.036							0	0				0	0	0	0	0	0	0	0	0	0	0	0	0	0	0	0	0	0	0	0	0	0	0	0	0	0	0
0	0	M	48	0.83	14.6			6140										1	0				0	0	0	0	0	0	0	0	0	0	0	0	0	0	0	0	0	0	0	0	0	0	0	0	0	0	0
0	0	M	80	0.6	13.3	0.55	175	9800	0.5	3.9								1	0				0	0	0	1	0	0	0	0	0	0	0	0	0	0	0	0	0	0	0	0	0	0	0	0	0	0	0
1	1	F	65	0.71	12.4		442	16320	0.38	4	0.11	0.06	0.07					1	0				0	0	0	0	0	0	0	0	0	0	0	0	0	0	0	0	0	0	1	0	0	0	1	0	0	0	0
0	0	F	43		12.3		476	10180	0.16		0.08							0	0				0	0	0	0	0	0	0	0	0	0	0	0	0	0	0	0	0	0	0	0	0	0	0	0	0	0	0
0	0	M	63	0.8	12.2	0.16	225	5700	0.4									0	0				0	0	0	1	0	0	0	0	0	0	0	0	0	0	0	0	0	0	0	0	0	0	0	0	0	0	0
0	0	F	62	1	9.6		335	6700		4								0	0				0	0	0	0	0	0	0	0	0	0	0	0	0	0	0	0	0	1	0	0	0	0	1	0	0	0	0
1	1	F	62		7.9	28.51	31	600	0.6									0	0				0	0	0	0	0	0	0	1	0	0	0	0	0	0	0	0	1	0	0	0	0	0	0	0	0	0	0
0	0	M	80	0.82	13		104	7990	0.5									0	0				0	0	0	0	0	0	0	0	0	0	0	0	0	0	0	0	0	1	0	1	0	0	1	0	0	0	0
1	1	M	35	0.8	4.3	4.62	10	79300	0.4	4.6								0	0				0	0	0	0	0	0	0	1	0	0	0	0	0	0	0	0	1	0	0	0	0	0	0	0	0	0	0
1	1	F	36	0.6	10.7	13.25	337	6300	0.4	4.2	0.11							1	0				0	0	0	0	0	0	0	1	1	0	0	0	0	0	0	0	1	0	0	0	0	0	0	0	0	0	0
0	0	M	78	1	12.9	9.566	309	7580	0.5	3	0.265							0	0				0	0	0	1	0	0	0	0	0	0	0	0	0	0	0	0	0	0	0	0	0	0	0	0	0	0	0
7	2	M	71	0.62	11.8	3.27	380	13910	0.35		0.077							1	0				0	0	0	1	0	0	0	0	0	0	0	0	0	0	0	0	0	1	0	0	0	0	1	0	0	0	0
1	1	F	23	0.71	6.8	4.36	6	60	0.3	3	0.023							0	0				0	0	0	0	0	0	0	1	0	0	0	0	0	1	1	1	1	0	0	0	0	0	0	0	0	0	0
2	1	F	52	0.8	8.9	7.64	31	7300	0.4	4	0.545	0.046	0.613	0.046	0.613	0.046	0.613	0	0				0	0	0	0	1	0	0	1	0	0	0	0	0	0	0	1	1	0	0	0	0	0	0	0	0	0	0
0	0	F	63	0.42	10.5		162	8910	0.28		0.151							1	0				0	0	0	0	0	0	0	0	0	0	0	0	0	0	0	0	0	0	0	0	0	0	0	0	0	0	0
2	1	M	20		7.7	16.2	1	30	0.7		6.485							0	1	01	1	ICD10	0	0	0	0	0	0	0	0	0	0	0	0	0	0	0	0	1	0	0	0	0	0	0	0	0	0	1
0	0	M	84	0.9	11.8	12.94	129	8720	1.9	2.3	0.05							0	1	16	16	ICD10	0	0	0	0	0	1	0	0	0	0	0	0	0	0	0	0	0	0	0	0	0	0	0	0	0	0	1
2	1	F	8	0.43	7.7	0.377	17	30	1.4	3.7	2.923	0.044	6.39	0.044	6.39			0	1	01	1	ICD10	0	0	0	0	0	0	0	1	0	0	0	0	0	0	0	0	1	0	0	0	0	0	0	0	0	0	1
2	1	M	55	0.29	9.7	4.88	155	7340	1.01		5							1	1	26	26	ICD10	0	0	0	0	0	0	0	0	0	0	0	0	0	0	0	0	0	0	0	0	0	0	0	0	0	0	1
1	1	M	67	0.53	11.7	3.25	42	4960	0.5	3.8	0.219	0.196	0.335	0.196	0.335	0.196	0.335	0	1	36	36	ICD10	0	0	0	1	0	1	0	0	0	0	0	0	0	0	0	0	0	1	0	0	0	0	1	0	0	0	1
2	1	F	46	1.33	10.4	18.261	419	6760	0.19	3.9	0.069							1	1	01	1	ICD10	0	0	0	0	0	0	0	0	0	0	0	0	0	0	0	0	0	0	1	0	0	0	1	0	0	0	1
8	3	M	70	0.95	10.3	1.02	338	10940	8.48	3.2								0	1	36	36	ICD10	0	0	0	0	0	1	1	0	0	0	0	0	0	0	0	0	0	0	0	0	0	0	0	0	0	0	1
2	1	M	73	0.66	8.9		254	3780	0.5	3.4	0.091							1	1	01	1	ICD10	0	0	0	0	0	0	0	0	0	0	0	0	0	0	1	0	1	0	0	0	0	0	0	0	0	0	1
4	1	M	44	1.34	7.1		5	300	0.4	3.8	1.149	0.092	1.149	0.092	1.149			1	1	01	1	ICD10	0	0	0	0	0	0	0	0	0	0	0	0	0	0	0	0	0	1	0	0	0	0	1	0	0	0	1
7	2	M	55	0.79	14.6	0.775	191	7950	0.4	3.7	0.098	0.043	0.102	0.043	0.102	0.043	0.094	1	1	18	18	ICD10	0	0	0	1	0	0	1	0	0	0	0	0	0	0	0	0	0	0	0	0	0	0	0	0	0	0	1
3	1	M	61	0.57	9.5	0.27	188	10400	0.6	4.3	1.038	0.141	3.273	0.141	3.273	0.284	3.273	0	0				0	0	0	1	1	0	0	0	0	0	0	0	0	0	0	0	0	1	0	0	0	0	1	0	0	0	1
7	2	M	60	0.81	16.7	1.367	303	8000	0.4		0.114	0.037	0.151	0.037	0.151	0.037	0.151	0	0				0	0	0	1	1	0	0	0	0	0	0	0	0	0	0	0	0	0	0	0	0	0	0	0	0	0	1
3	1	M	57	0.89	10.4		312	4040	0.39	4.3	0.068	0.042	1.693	0.042	1.693	0.042	1.693	0	0				0	0	0	0	0	0	0	0	0	0	0	1	0	0	0	0	1	0	1	0	0	0	1	0	0	0	1
4	1	M	69	0.94	10.2		295	12040	0.72	3.9	9.044							1	0				0	0	0	0	0	0	0	0	0	0	0	0	0	0	0	0	0	0	0	1	0	0	1	0	0	0	1
2	1	F	50	1.2	9.6	6.6	192	8900	0.9	2.8								1	1	26	26	ICD9	1	1	1	0	0	0	0	0	0	0	0	0	0	0	0	0	0	0	0	0	0	0	0	0	0	0	0
0	0	M	83	1.6	14.1		310	9300	0.9									1	1	11	11	ICD10	1	1	1	0	0	0	1	0	0	0	0	0	0	0	0	0	0	0	0	0	0	0	0	0	0	0	0
2	1	F	80	0.7	13	24.85	131	12700	0.9	4.4								1	1	26	26	ICD10	0	1	1	0	0	0	0	0	0	0	0	0	0	0	0	0	1	0	0	0	0	0	0	0	0	0	0
4	1	M	76		11	14	63	143000	3.3									0	1	16	16	ICD10	1	1	1	0	0	0	0	0	0	0	0	0	0	0	0	0	0	0	0	0	0	0	0	0	0	0	0
2	1	F	24	3.5	5.8	0.03	54	3500	0.6	2.7								1	1	26	26	ICD10	1	1	1	0	0	0	0	0	0	0	0	0	0	0	0	0	0	0	0	0	0	0	0	0	0	0	0
3	1	M	58	0.8	11.5	2.29	81	3300	0.2	3.1	0.79	0.52	0.79			0.52	0.79	1	1	36	36	ICD10	0	1	1	0	0	0	1	0	0	0	0	0	0	0	0	0	0	0	0	0	0	0	0	0	0	0	0
1	1	M	63	0.7	10.9	5.55	226	4400	0.3	4.1	0.339	0.295	0.339			0.295	0.339	0	1	01	1	ICD10	1	1	1	0	0	0	1	1	0	0	0	0	0	0	0	0	1	0	0	0	0	0	0	0	0	0	0
1	1	F	42	1.9	7.7	0.54	68	4300	1	3.8	1.867							1	1	01	1	ICD10	1	1	1	0	0	0	0	0	0	0	0	0	0	0	0	0	0	0	0	0	0	0	0	0	0	0	0
6	0	M	97	2.6	11.6	8.41	184	11800	0.5	3.9	0.13							1	1	27	27	ICD10	0	1	1	1	0	0	1	0	0	0	0	0	0	0	1	0	1	0	0	1	0	0	1	0	0	0	0
9	3	F	81	1	12.6	0.58	336	9100	0.2	2.7								1	1	36	36	ICD10	0	1	1	0	0	0	1	0	0	0	0	0	0	0	0	0	0	0	0	1	0	0	1	0	0	0	0
4	1	M	76	3.98	10.5	27.39	147	13960	1.1	4.1	9.323							1	1	36	36	ICD10	1	1	1	1	0	0	1	0	0	0	0	0	0	0	0	0	0	1	0	1	0	0	1	0	0	0	0
1	1	F	85	1.24	7.2	4.123	30	58630	0.2		0.138							0	1	01	1	ICD10	0	1	1	0	1	0	0	1	0	0	0	0	0	0	0	0	1	0	0	0	0	0	0	0	0	0	0
4	1	M	48	1.2	14.1	1.125	253	13960	1.2		0.086	0.074	0.686	0.074	0.686	0.074	0.686	1	1	26	26	ICD10	1	1	1	0	0	0	0	0	0	0	0	0	0	0	0	0	0	0	0	0	0	0	0	0	0	0	0
2	1	M	85	1.23	10	7.13	298	6330	0.5	3.3	0.144							1	1	01	1	ICD10	0	1	1	0	0	0	0	0	0	0	0	0	0	0	0	0	0	0	0	1	0	0	1	0	0	0	0
4	1	F	88	0.88	9.1	34.85	172	21450	0.3	4.2	6.749							0	1	16	16	ICD10	0	1	1	0	1	0	0	0	0	0	0	0	0	0	0	0	0	0	0	0	0	0	0	0	0	0	0
2	1	M	69	2.03	11.4	2.92	186	11540	0.5	3.8	0.114	0.041	7.011			0.041	7.011	1	1	36	36	ICD10	1	1	1	1	0	0	0	0	0	0	0	0	0	0	0	0	0	0	0	0	0	0	0	0	1	1	0
1	1	M	51	0.79	10.5	14.38	122	4510	1	4.5	0.057	0.052	0.088	0.052	0.088	0.052	0.088	1	1	01	1	ICD10	1	1	1	0	0	0	0	1	0	0	0	0	0	0	1	0	1	0	0	0	0	0	0	0	0	0	0
2	1	F	70	0.7	8.8	4.94	219	3700	0.2		0.786							1	1	01	1	ICD10	0	1	1	0	1	0	1	0	0	0	0	1	0	0	1	0	1	0	0	0	0	0	0	0	0	0	0
0	0	M	84	1.4	9.2	22.3	265	46240	2	4.1	0.069							0	1	01	1	ICD10	1	1	1	0	0	0	0	0	0	0	0	0	0	0	0	0	0	0	0	0	0	0	0	0	0	0	0
0	0	M	50	0.7	15.4	0.27	257	14500	0.2		0.121	0.056	0.121	0.056	0.121	0.056	0.121	0	1	18	18	ICD10	1	1	1	1	0	0	0	0	0	0	0	0	0	0	0	0	0	0	0	0	0	0	0	0	0	0	0
2	1	F	27	0.6	8.2	9.937	122	2480	0.3	4.9	0.851	0.002	0.934	0.002	0.934	0.002	0.934	1	1	01	1	ICD10	0	1	1	0	0	0	0	1	0	0	0	0	0	0	0	0	1	0	0	0	0	0	0	0	0	0	0
4	1	M	25	9.98	7.9	0.082	159	32620	1.3	3.2	0.068							0	1	26	26	ICD10	1	1	1	0	0	0	0	0	0	0	0	0	0	0	0	0	1	0	0	0	0	0	0	0	0	0	0
0	0	F	90	0.81	8.3	8.391	118	6860	0.6	4.1	3.389							1	1	26	26	ICD10	0	1	1	0	0	0	0	0	0	0	0	0	0	1	0	0	1	0	0	0	0	0	0	0	0	0	0
2	1	F	79	0.46	9.2	1.697	382	7880	0.2	2.4	0.909							0	1	01	1	ICD10	0	1	1	0	0	0	1	0	0	0	0	0	1	0	1	0	1	0	0	0	0	0	0	0	0	0	0
4	1	M	28	0.78	8.7	0.012	284	18560	0.4		7.556							1	1	26	26	ICD10	1	1	1	0	0	0	0	0	0	0	0	0	0	0	0	0	0	0	0	0	0	0	0	0	0	0	0
1	1	M	78	1.04	12	8.432	239	7890	0.7	4.1	0.061							1	1	36	36	ICD10	0	1	1	1	0	0	0	0	0	0	0	0	0	0	0	0	0	0	0	1	0	0	1	0	0	0	0
2	1	M	72	1.2	9.8	7.442	235	5410	0.8	3.4	1.076	0.038	3.088	0.251	3.088	0.038	3.088	1	1	01	1	ICD10	0	1	1	0	1	0	1	0	0	0	0	0	1	0	0	0	1	0	1	0	0	0	1	0	0	0	0
9	3	M	90	1.66	9	0.605	157	5420	0.4	3.4								0	1	04	4	ICD10	0	1	1	0	0	0	1	0	0	0	0	0	0	0	0	0	0	0	0	0	0	0	0	0	0	0	0
1	1	F	63	1.22	6.9	0.583	98	2700	0.4		0.095	0.095	0.097			0.095	0.097	1	1	01	1	ICD10	0	1	1	0	0	0	1	0	0	0	0	1	0	0	1	0	1	0	0	0	0	0	0	0	0	0	0
2	1	M	62	2.66	12.3	0.269	148	6940	0.7	3.9	0.426							1	1	19	19	ICD10	0	1	1	1	0	0	0	0	0	0	0	0	0	0	0	0	0	0	0	0	0	0	0	0	1	1	0
2	1	F	68	5.9	6	27.96	24	190	0.5	2.8	2.053	0.32	2.053			0.32	2.053	1	1	01	1	ICD10	1	1	1	0	0	0	0	0	0	0	0	0	0	1	0	0	1	0	0	0	0	0	0	0	0	0	0
2	1	F	52	5.6	11.2	2.78	163	10500	0.1	3	0.184	0.062	0.473			0.062	0.473	1	1	11	11	ICD10	1	1	1	0	0	0	0	0	0	0	0	0	0	0	0	0	0	0	0	0	0	0	0	0	0	0	0
3	1	M	83	1.22	12.3	0.055	126	13150	0.6	2.8	1.062							1	1	10	10	ICD10	1	1	1	0	0	0	0	0	0	0	0	0	0	0	0	0	0	0	0	0	0	0	0	0	0	0	0
0	0	M	65	1.1	12.5		180	8500		3.9								0	0				0	1	1	1	0	0	1	0	0	0	0	0	0	0	0	0	0	0	0	0	0	0	0	0	0	0	0
6	0	F	68	5.9	7.9	0.04	92	7700	0.6	4.2								1	0				1	1	1	0	0	0	0	0	0	0	0	0	0	0	0	0	0	0	0	0	0	0	0	0	0	0	0
1	1	F	73	1.3	7.6	1.94	9	1300	1.2									1	0				0	1	1	1	1	0	0	0	0	0	0	0	0	1	0	0	1	0	0	0	0	0	0	0	0	0	0
7	2	M	63	0.9	10.6	5.05	503	12000	0.1	3.6	0.308	0.24	0.308	0.24	0.308	0.24	0.308	0	0				0	1	1	1	0	0	0	0	0	0	0	0	0	0	0	0	0	0	0	0	0	0	0	0	0	0	0
2	1	M	31	1.2	5.9	5.58	108	4100	0.4	4.1	0.655	0.062	0.655			0.062	0.655	1	0				0	1	1	0	0	0	0	0	0	0	0	0	0	0	0	0	0	0	0	0	0	0	0	0	0	0	0
9	3	F	81	1.42	10.7	0.18	169	3700	0.4	3.4								0	0				0	1	1	0	0	0	0	0	0	0	0	0	0	0	0	0	0	0	1	0	0	0	1	0	0	0	0
0	0	F	52	0.64	11.1	0.031	226	3300	0.2	4.8	0.262	0.262	0.916	0.262	0.916	0.262	0.916	1	0				0	1	1	0	0	0	0	0	0	0	0	0	0	0	0	0	0	0	0	0	0	0	0	0	0	0	0
0	0	M	81	0.88	11	4.51	466	11660	0.9		0.074	0.074	0.078	0.074	0.078	0.074	0.078	1	0				0	1	1	1	1	0	0	0	0	0	0	0	0	0	0	0	0	0	0	0	0	0	0	0	0	0	0
0	0	M	39	6.57	4.3	6.37	43	1400	0.2	3.6	0.157	0.082	0.157			0.082	0.157	1	0				1	1	1	0	0	0	0	0	0	0	0	0	0	1	0	0	1	0	0	0	0	0	0	0	0	0	0
10	3	F	67	0.91	11.5	0.046	163	3600	0.5	4.2	0.292	0.29	0.292	0.29	0.292	0.29	0.292	1	0				0	1	1	0	0	0	0	0	0	0	0	0	0	0	0	0	0	0	0	0	0	0	0	0	0	0	0
1	1	F	34	0.66	9.8	1.17	120	3820	1.5	3	0.072	0.035	0.117			0.035	0.117	0	0				0	1	1	0	0	0	0	0	0	0	0	0	0	1	0	1	1	0	0	0	0	0	0	0	0	0	0
2	1	F	44	0.68	6.8	0.567	47	1770	0.9	3.3	0.041	0.041	2.478	0.041	2.478	0.041	2.478	0	0				0	1	1	0	0	0	1	1	0	0	0	0	0	0	0	1	1	0	0	0	0	0	0	0	0	0	0
9	3	F	67	0.87	9	1.087	366	5960	0.4	3.7	0.219	0.219	0.605			0.219	0.605	1	0				1	1	1	0	0	0	1	0	0	0	0	0	0	0	0	0	0	1	0	0	0	0	1	0	0	0	0
9	3	M	51	1.37	16	0.172	244	12460	0.8	4.3								1	0				0	1	1	0	0	0	1	0	0	0	0	0	0	0	0	0	0	0	0	0	0	0	0	0	1	1	0
1	1	M	60	1.41	9.2	3.423	262	3070	0.4	4.6	0.411	0.105	0.411	0.105	0.411	0.105	0.411	1	0				1	1	1	0	0	0	1	0	0	0	0	0	0	0	0	0	0	0	0	0	0	0	0	0	1	1	0
0	0	M	79	1.12	10.5	12.62	363	9570	0.3	3.1	1.568	0.176	1.568	0.176	1.568	0.176	1.568	1	0				0	1	1	0	1	0	1	0	0	0	0	0	0	0	0	0	0	0	0	0	0	0	0	0	0	0	0
2	1	M	36	1.77	7.8	14.03	179	15580	0.2	4.6	0.079							1	0				1	1	1	0	1	1	0	0	0	0	0	0	0	0	0	0	0	0	0	0	0	0	0	0	0	0	0
0	0	F	71	0.88	12	12.04	241	8230	0.4		0.218	0.218	0.988			0.218	0.988	0	0				0	1	1	0	0	0	1	0	0	0	0	0	0	0	0	0	0	1	0	0	0	0	1	0	0	0	0
2	1	F	53	1.33	12.3	0.069	143	5510	0.9		0.574	0.035	1.549	0.035	1.549	0.035	1.549	0	0				0	1	1	0	1	0	1	0	0	0	0	0	0	1	0	1	1	0	0	0	0	0	0	0	0	0	0
9	3	M	53	1.89	9.9	0.704	125	24440	0.3	4.2	0.2							1	0				0	1	1	0	0	0	0	0	0	0	0	0	0	0	0	0	0	0	0	0	0	0	0	0	0	0	0
0	0	M	72	0.9	11.1		205	4930	0.2		0.081							0	0				0	1	1	1	0	0	0	0	0	0	0	0	0	0	0	0	0	1	0	0	0	0	1	0	0	0	0
1	1	M	72	2.18	13.4	9.48	299	4920	1.4	4.3	0.053	0.072	0.157			0.072	0.157	1	0				0	1	1	0	0	0	1	0	0	0	0	0	0	0	0	0	0	0	0	0	0	0	0	0	1	1	0
4	1	F	82	4.61	10.1	12.78	116	7240	0.5	3	0.083	0.083	3.857			0.083	3.857	1	0				1	1	1	0	0	0	0	0	0	0	0	0	0	0	0	0	0	0	0	0	0	0	0	0	0	0	0
0	0	M	62	5.14	11.3	0.126	258	5630	0.26	2.8	0.045							1	0				1	1	1	0	0	0	1	0	0	0	0	0	0	0	0	0	0	0	0	0	0	0	0	0	1	1	0
0	0	M	63	5.97	9.5	4.769	146	3830	0.6	2.6	0.096							0	0				1	1	1	0	0	0	1	0	0	0	0	0	0	1	1	0	1	0	0	0	0	0	0	0	0	0	0
2	1	F	53	0.75	12.5	0.02	190	11310	0.9	4.5	0.185							1	0				0	1	1	0	0	0	0	0	0	0	0	0	0	0	0	0	0	0	1	0	1	0	1	0	0	0	0
0	0	M	58	1.12	8.3	0.65	60	3500	0.77	3.6	0.062	0.065	0.201			0.065	0.201	1	0				0	1	1	1	0	0	0	1	0	0	0	0	0	1	0	0	1	0	0	0	0	0	0	0	0	0	0
2	1	M	43	1.29	6.7	9.253	84	440	1.6	3.1	0.29	0.057	0.367			0.057	0.367	1	0				0	1	1	0	1	0	1	0	0	0	0	0	0	0	0	0	0	0	0	0	0	0	0	0	0	0	0
8	3	F	83	1.01	11.6	1.514	153	7910	0.28	2.8	0.356	0.075	0.356			0.075	0.356	1	0				0	1	1	1	1	0	0	0	0	0	0	1	0	0	1	0	1	0	0	0	0	0	0	0	0	0	0
9	3	M	60	1.53	11.9		286	5960	0.36	4.2	3.501							0	0				0	1	1	0	0	0	1	0	0	0	0	0	0	0	0	0	0	0	0	0	0	0	0	0	0	0	0
0	0	M	58	1.01	8.8	24.821	514	16000			0.077							1	0				0	1	1	0	1	0	0	0	0	0	0	0	0	0	0	0	0	0	0	0	0	0	0	0	0	0	0
6	0	F	65	1.14	111	41	288	3880		8.1	0							0	0				1	1	1	1	1	1	1	1	1	0	1	1	1	0	1	0	1	1	1	1	1	1	1	1	1	1	0
0	0	M	73	1.18	13.8	1.35	220	5860	0.63	4.5	0.042							0	0				0	1	1	1	0	0	1	0	0	0	0	0	0	0	0	0	0	1	0	0	0	0	1	0	0	0	0
0	0	M	67	0.94	10.7	7.86	148	6590	0.3	4.5	0.083							0	0				0	1	1	0	0	0	1	0	0	0	0	0	0	0	0	0	0	0	0	0	0	0	0	0	0	0	0
1	1	F	52	1.03	6.4	3.149	13	2280	0.5	2	0.041	0.031	0.106	0.031	0.106	0.031	0.106	0	0				0	1	1	0	0	0	0	0	0	0	0	0	0	1	0	1	1	0	0	0	0	0	0	0	0	0	0
0	0	M	93	10.47	7	3.81	209	5390	0.17	3.6	3.921	0.049	3.921			0.063	3.921	0	0				1	1	1	0	0	0	1	0	0	0	0	0	0	0	0	0	0	1	0	0	0	0	1	0	0	0	0
4	1	F	60	1.28	9.7	19.48	79	9700	0.8	2.9	8.765							0	0				0	1	1	0	0	0	1	0	0	0	0	0	0	0	0	0	0	0	0	0	0	0	0	0	0	0	0
6	0	M	8	8.25	10	0.016	240	11850	0.1	3	0.053							1	1	36	36	ICD10	0	1	1	0	0	0	0	0	0	0	0	0	0	0	0	0	0	0	0	0	0	0	0	0	0	0	1
5	1	M	73	0.77	12.7	19.86	123	7550	0.6		4.241							0	1	15	15	ICD10	1	1	1	0	0	0	1	0	0	0	0	0	0	0	0	0	0	0	0	0	0	0	0	0	0	0	1
9	3	F	55	1.4	11.2	0.224	289	3970	0.8	4.1	0.05	0.05	0.098					1	1	01	1	ICD10	0	1	1	0	0	0	0	0	0	0	0	0	0	0	0	0	0	0	1	0	0	0	1	0	0	0	1
0	0	M	93		11	10.95	125	2270	0.8		2.93							0	1	16	16	ICD10	1	1	1	0	0	0	0	0	0	0	0	0	0	0	0	0	0	0	0	0	0	0	0	0	0	0	1
4	1	M	84		7.3		91	7010	0.22		1.187							0	1	18	18	ICD10	1	1	1	0	0	0	0	0	0	0	0	0	0	0	0	0	0	0	0	0	0	0	0	0	0	0	1
1	1	F	68	1.24	10.6		503	8420	0.28	2.9	0.07	0.07	0.108	0.07	0.108	0.07	0.108	1	1	01	1	ICD10	1	1	1	0	0	0	0	0	0	0	0	1	0	0	1	0	1	0	0	0	0	0	0	0	0	0	1
4	1	M	44	1.43	10		38	2190	2.6		0.381							0	1	04	4	ICD10	1	1	1	0	0	0	0	0	0	0	0	0	0	0	0	0	0	0	0	0	0	0	0	0	0	0	1
2	1	F	83	2.02	13.9	2.15	78	4830	3.69	2.9	0.647	0.647	2.083					1	1	36	36	ICD10	1	1	1	0	0	1	0	0	0	0	0	0	0	0	0	0	0	0	0	1	0	0	1	0	0	0	1
0	0	M	89	2.41	9.1	0.109	166	4360	1.3	3.8	0.117							1	0				0	1	1	1	1	1	1	0	0	0	0	0	0	0	1	0	1	0	0	1	0	0	1	0	0	0	1
2	1	M	64	2.31	7.5	0.293	73	2250	0.7	3.5	0.099	0.026	1.739	0.027	1.739	0.026	1.739	1	0				1	1	1	0	0	0	1	0	0	0	0	0	0	0	0	0	0	0	0	1	0	0	1	0	1	1	1
2	1	M	62	1.99	9.8	0.63	156	4310	0.3	4	4.71	0.038	6.81	0.038	6.81	0.038	6.81	0	0				0	1	1	0	0	0	1	0	0	0	0	1	0	0	0	1	1	0	1	0	0	0	1	0	0	0	1
7	2	M	60	0.78	12.5		280	9620	0.69	4.3	0.141							0	0				0	1	1	0	0	0	1	0	0	0	0	0	0	0	0	0	0	1	0	0	0	0	1	0	0	0	1
2	1	M	44	0.6	15.1		94	7620	18.38	2.9	2.319	1.203	2.319	2.084	2.319			0	0				0	1	1	0	0	1	1	0	0	0	0	0	0	0	0	0	0	0	0	0	0	0	0	1	0	1	1
2	1	F	45	1.02	9.9	0.02	286	9850	0.12	3.1	0.654	0.058	0.654					1	0				1	1	1	1	0	0	0	0	0	0	0	0	0	0	0	0	0	0	0	0	0	0	0	0	0	0	1
0	0	M	54	1.29	11.5	0.074	260	7530	0.42	4.1	0.099							1	0				0	1	1	0	0	0	0	1	0	0	0	0	0	0	0	0	1	0	0	0	0	0	0	0	0	0	1
1	1	M	81	8.19	8	1.603	46	6820	0.81	3	0.244	0.05	0.244					0	0				1	1	1	0	0	0	0	0	0	0	0	0	0	0	0	0	0	0	0	0	0	0	0	0	0	0	1
7	2	F	36	0.53	12.6	2.344	150	7290	0.98	3.4	0.13							0	0				0	1	1	1	0	0	0	0	0	0	0	0	0	0	0	0	0	0	0	0	0	0	0	0	0	0	1
5	1	F	61	2.12	14.2	9	178	5090	0.27	4	0.086	0.039	1.803					0	0				1	1	1	1	0	0	1	0	0	0	0	0	0	0	0	0	0	0	0	0	0	0	0	0	0	0	1
1	1	F	80	1.44	8.2	1.34	100	2940	0.4	2.6	0.071	0.041	0.217	0.045	0.217	0.045	0.217	1	0				1	1	1	0	0	0	0	0	0	0	1	0	0	0	1	0	1	0	0	0	0	0	0	0	0	0	1
2	1	M	28	0.94	11.5	2.645	457	18900	1	3.4	0.094	0.053	0.536	0.053	0.536	0.072	0.536	0	0				0	1	1	0	0	0	0	0	0	0	0	0	0	0	0	0	0	0	1	0	0	0	1	0	0	0	1
0	0	F	22	2.1	8.9	0.05	201	10300	0.7	2.8								1	0				1	1	1	0	0	0	0	0	0	0	0	0	0	0	0	0	0	0	0	0	0	0	0	0	0	0	1
2	1	F	81	1.31	8.9	1.161	107	4470	1.06	4.3	0.055	0.044	0.057			0.055	0.057	1	0				0	1	1	0	0	0	0	1	0	0	0	0	0	0	1	0	1	0	0	0	0	0	0	0	0	0	1

## Sheet: code
	code	group2
no IPA	0	0					Acute_myeloid	hematological_dis		Lung_cancer	Cancer		HEMODIALYSIS	dialysis_dis
possible IPA	1	1					Acute_lymphoid			Head_neck			DIALYSIS
propable IPA	2	1					Chronic_myeloi			Gastrointestin
proven IPA	3	1					Chronic_lympho			Breast_cancer
putative IPA	4	1					NonHodgkin_lym			Melanoma
IAPA	5	1					Multiple_myelo
colonization	6	0					Aplastic_anemi
CPA	7	2					Other_haematol
cutaneous	8	3					Haemotological
rhinosinusitis	9	3
otomycosis	10	3
group
		Frequency	Percent	Valid Percent	Cumulative Percent
Valid	0	82	31.1787	31.1787	31.1787
	1	50	19.0114	19.0114	50.1901
	2	47	17.8707	17.8707	68.0608
	3	11	4.18251	4.18251	72.2433
	4	17	6.46388	6.46388	78.7072
	5	3	1.14068	1.14068	79.8479
	6	8	3.04183	3.04183	82.8897
	7	15	5.70342	5.70342	88.5932
	8	3	1.14068	1.14068	89.7338
	9	26	9.88593	9.88593	99.6198
	10	1	0.380228	0.380228	100
	Total	263	100	100
